# Supplementary material for: A class of probability distributions for application to non-negativeannual maxima
Source: Copernicus journal article supplement (doi:10.5194/hess-2017-198), 2017-05-17
Supplement: Supplementary file [file hess-2017-198-AC2-supplement.pdf]

My thanks for your comments Francesco

It's really good to be finally free of the criticism that I was rediscovering that a Weibull distribution could be created by a sign change applied to an EV3 distribution of maxima.

I won't comment more on the previous review history of the paper in the various journals. In my experience (and most others too) an editor rejection is pretty much a final thing and certainly is not the first step in a subsequent negotiation process with reviewers.

I guess for HESS it's something of an academic distinction between being a "reviewer" or "critical commentator". It's just easier for me just to use "reviewer". The Editor no doubt takes note of both reviews and any critical comment. Authors must meet (if they can) whatever objections are raised by both. Your points are certainly noted and will need to be responded to along with reviewer comments. However, as mentioned, I will leave all further responses on the technical stuff and the paper motivation until the end of the review process.

Kind Regards

Earl
